# Supplementary material for: Identification of four functionally important microRNA families with contrasting differential expression profiles between drought-tolerant and susceptible rice leaf at vegetative stage
Source: PubMed Central journal article supplement (PMC4570225; doi:10.1186/s12864-015-1851-3), 2015-09-15
Supplement: 12864_2015_1851_MOESM1_ESM.pdf [file 12864_2015_1851_MOESM1_ESM.pdf]

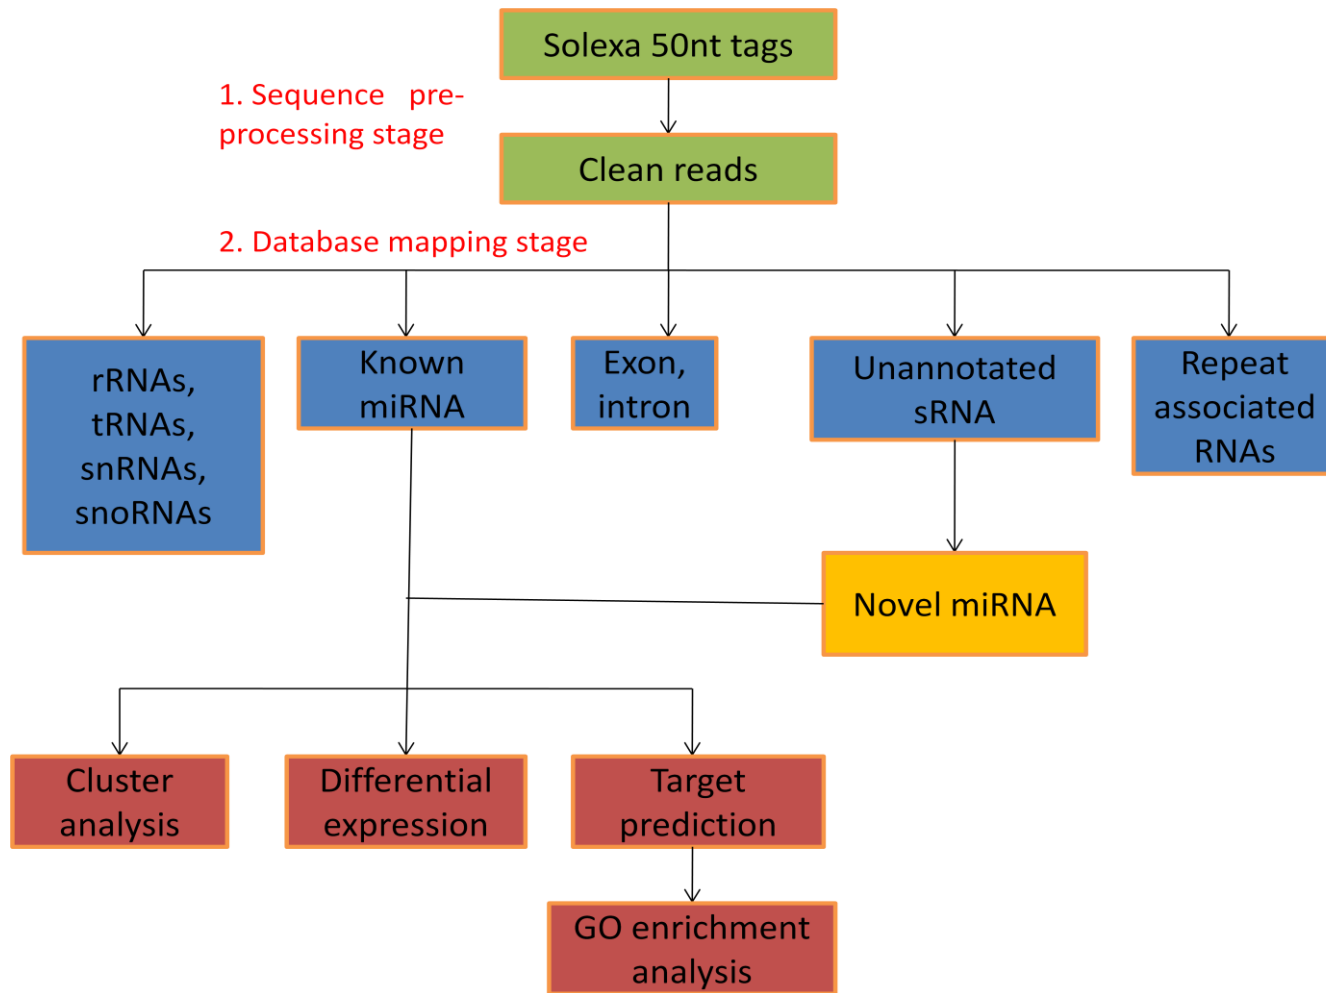

**Additional file 1. Flowchart for the analysis of sequence reads from small RNA libraries**
